# Supplementary material for: Inter-site harmonization based on dual generative adversarial networks for diffusion tensor imaging: application to neonatal white matter development
Source: PubMed Central journal article supplement (PMC6964111; doi:10.1186/s12938-020-0748-9), 2020-01-15

**Figure S1.** Relationship between inter-site differences and averaged fractional anisotropy (FA) values in the white matter region.  $r$ : Pearson correlation coefficient.

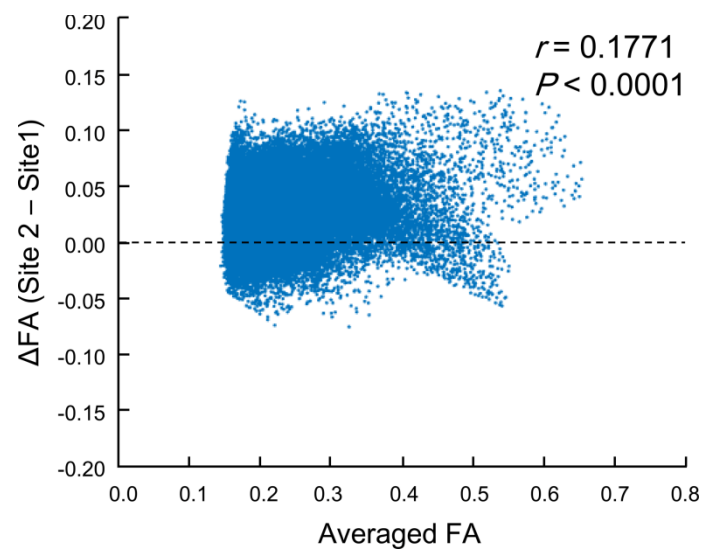

Supplement: 12938_2020_748_MOESM1_ESM.pdf [file 12938_2020_748_MOESM1_ESM.pdf]
