# Supplementary material for: Inter-site harmonization based on dual generative adversarial networks for diffusion tensor imaging: application to neonatal white matter development
Source: PubMed Central journal article supplement (PMC6964111; doi:10.1186/s12938-020-0748-9), 2020-01-15
Supplement: 12938_2020_748_MOESM3_ESM.pdf [file 12938_2020_748_MOESM3_ESM.pdf]

**Table S1.** Root mean square error (RMSE) on white matter before and after harmonization by using different methods.

| Methods              | Reference: Site 1 | Reference: Site 2 |
|----------------------|-------------------|-------------------|
| Original             | 0.0606            | 0.0606            |
| Global-wise scaling  | 0.0646            | 0.0529            |
| Voxel-wise scaling   | 0.0542            | 0.0479            |
| ComBat               | 0.0508            | 0.0508            |
| Dual GANs (axial)    | 0.0470            | <b>0.0391</b>     |
| Dual GANs (sagittal) | 0.0540            | 0.0497            |
| Dual GANs (coronal)  | 0.0535            | 0.0506            |
| Dual GANs (3D)       | <b>0.0408</b>     | 0.0409            |

Note: The values are the medians across subjects. RMSE values after harmonization have been averaged over different runs of the sixfold cross-validation. Bold indicates the smallest RMSE in the column. Dual GANs (axial), Dual GANs (sagittal), and Dual GANs (coronal) indicate the harmonization performed by using dual generative adversarial networks with the 2 dimensional kernel on axial slices, sagittal slices, and coronal slices, respectively. Dual GANs (3D) indicates the harmonization performed by using dual generative adversarial networks with the 3 dimensional kernel.
